# Supplementary material for: A NAC Transcription Factor TuNAC69 Contributes to ANK-NLR-WRKY NLR-Mediated Stripe Rust Resistance in the Diploid Wheat Triticum urartu
Source: MDPI journal article supplement (doi:10.3390/ijms23010564), 2022-01-05
Supplement: s1 [file s1]

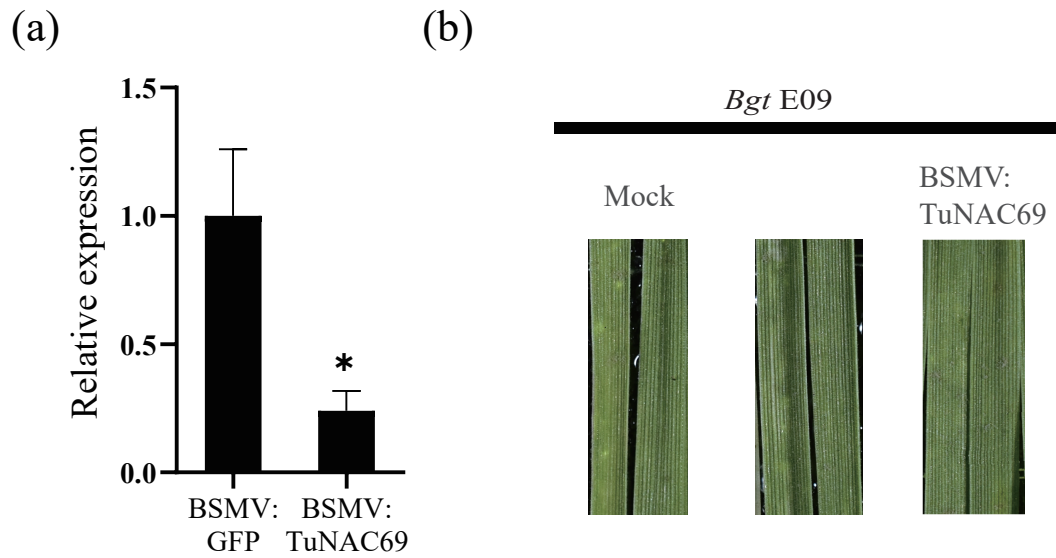

Figure S2. Knock down of *TuNAC69* by BSMV-induced gene silencing has no significant effect the resistance of PI428309 to *Bgt* E09.

(a) Analysis of VIGS silencing efficiency by qRT-PCR. *TuACTIN* was used as an internal control.

(b) PI428309 was inoculated with the BSMV on the second leaf. The fourth leaf of PI428309 was inoculated with urediniospores of *Bgt* E09 after 21 days. Leaves infected with *Bgt* were examined at 7 dpi. There was no significant difference between BSMV:GFP and BSMV:TuNAC69.
