# Supplementary material for: A NAC Transcription Factor TuNAC69 Contributes to ANK-NLR-WRKY NLR-Mediated Stripe Rust Resistance in the Diploid Wheat Triticum urartu
Source: MDPI journal article supplement (doi:10.3390/ijms23010564), 2022-01-05
Supplement: s1 [file s1]

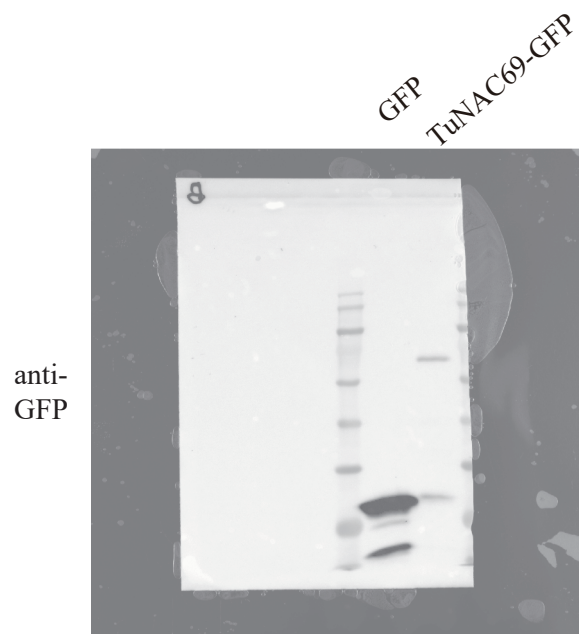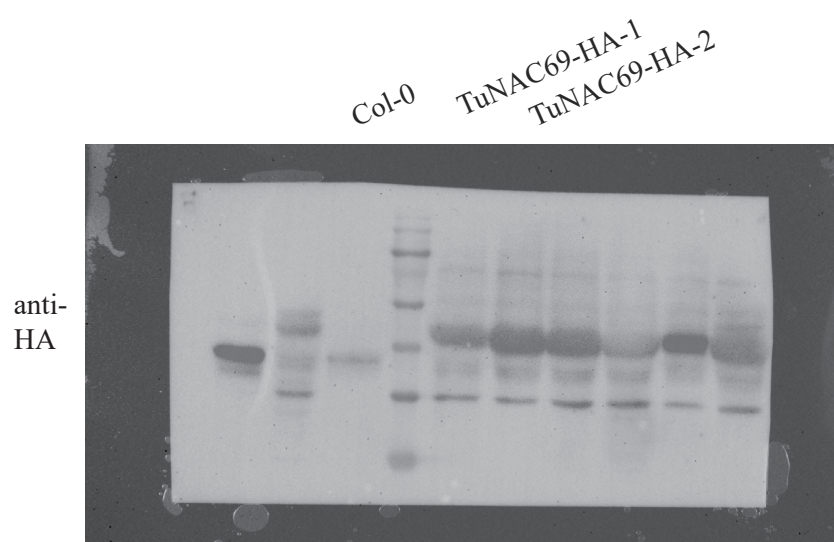

Figure S 3 . The full - size western blots gels of Figure 3c and Figure 8a.

(a) The full size western blots gels of Figure 3c

(b) The full size western blots gels of Figure 8a
