# Supplementary material for: A NAC Transcription Factor TuNAC69 Contributes to ANK-NLR-WRKY NLR-Mediated Stripe Rust Resistance in the Diploid Wheat Triticum urartu
Source: MDPI journal article supplement (doi:10.3390/ijms23010564), 2022-01-05
Supplement: s1 [file s1]

|           |                                                                                            |      |
|-----------|--------------------------------------------------------------------------------------------|------|
| TaNAC69-1 | ATGCCAATGGGCAGCAGC...GCGGCCATGCCCGCCCTCCCTCCCGGCTTCGGTTCCACCCACCGACGAGGAGCTCATCGTCCACTAC   | 87   |
| TaNAC69-2 | ATGCCAATGGGCAGCAGCAGCGCGCCATGCCCGCCCTCCCTCCCGGCTTCGGTTCCACCCACCGACGAGGAGCTCATCGTCCACTAC    | 90   |
| TaNAC69-3 | ATGCCAATGGGCAGCAGCAGCGCGCCATGCCCGCCCTCCCTCCCGGCTTCGGTTCCACCCACCGACGAGGAGCTCATCGTCCACTAC    | 90   |
| TuNAC69   | ATGCCAATGGGCAGCAGCAGCTGCCGCCATGCCCGCCCTCCCTCCCGGCTTCGGTTCCACCCACCGACGAGGAGCTCATCGTCCACTAC  | 90   |
| Consensus | atgccaatgggagcagc gcgcccatgcccgcctccctcccggttcgggttccacccacccgacgaggagctcatcgctccactac     |      |
| TaNAC69-1 | CTCGCAGGCAGGCGCGTCCATGCCAGCCCGTGCCCATCATCGCGAGGTCAACATCTACAAGTGCAACCCATGGGACCTCCCGGGC      | 177  |
| TaNAC69-2 | CTCGCAGGCAGGCGCGTCCATGCCAGCCCGTGCCCATCATCGCGAGGTCAACATCTACAAGTGCAACCCATGGGACCTCCCGGGC      | 180  |
| TaNAC69-3 | CTCGCAGGCAGGCGCGTCCATGCCAGCCCGTGCCCATCATCGCGAGGTCAACATCTACAAGTGCAACCCATGGGACCTCCCGGGC      | 180  |
| TuNAC69   | CTCGCAGGCAGGCGCGTCCATGCCAGCCCGTGCCCATCATCGCGAGGTCAACATCTACAAGTGCAACCCATGGGACCTCCCGGGC      | 180  |
| Consensus | ctc gcaggcaggcgcgctccatgccagcccggtgcccatcatcgcgagggtcaacatctacaagtgaacccatgggacctcccgggc   |      |
| TaNAC69-1 | AAGGCTTTGTTTCGGGGAGAATGAGTGGTACTTCTTCAGCCCCCGGGATCGCAAGTACCCCAACGGCGCGCGCCGCAACCGCGCCGCGGG | 267  |
| TaNAC69-2 | AAGGCTTTGTTTCGGGGAGAATGAGTGGTACTTCTTCAGCCCCCGGGATCGCAAGTACCCCAACGGCGCGCGCCGCAACCGCGCCGCGGG | 270  |
| TaNAC69-3 | AAGGCTTTGTTTCGGGGAGAATGAGTGGTACTTCTTCAGCCCCCGGGATCGCAAGTACCCCAACGGCGCGCGCCGCAACCGCGCCGCGGG | 270  |
| TuNAC69   | AAGGCTTTGTTTCGGGGAGAATGAGTGGTACTTCTTCAGCCCCCGGGATCGCAAGTACCCCAACGGCGCGCGCCGCAACCGCGCCGCGGG | 270  |
| Consensus | aa gc ttgttcggggagaatgagtggtacttcttcagccccgggatcgcaagtaccccaacggcgcgcgccc aaccgcgccgcgcggg |      |
| TaNAC69-1 | TCCGGCTACTGGAAGGCCACCGGCACCGACAAGGCCATCTCTGCCAGCCGGCCCAACGAGAGCATCGGGGTAAAGAAGGCGCTCGTCTTC | 357  |
| TaNAC69-2 | TCCGGCTACTGGAAGGCCACCGGCACCGACAAGGCCATCTCTGCCAGCCGGCCCAACGAGAGCATCGGGGTAAAGAAGGCGCTCGTCTTC | 360  |
| TaNAC69-3 | TCCGGCTACTGGAAGGCCACCGGCACCGACAAGGCCATCTCTGCCAGCCGGCCCAACGAGAGCATCGGGGTAAAGAAGGCGCTCGTCTTC | 360  |
| TuNAC69   | TCCGGCTACTGGAAGGCCACCGGCACCGACAAGGCCATCTCTGCCAGCCGGCCCAACGAGAGCATCGGGGTAAAGAAGGCGCTCGTCTTC | 360  |
| Consensus | tccgg tactggaaggccacggccacgcacaaggccatctctgccagccggccaacgagagcatcgg gt aagaaggcgctcgt ttc  |      |
| TaNAC69-1 | TACGGGGCAAGCCGCCCAAGGGCGTCAAGACCGACTGGATCATGCACAGTACCGCCTCACCGCGCCGCAACCGGACCCACCAAGCGC    | 447  |
| TaNAC69-2 | TACGGGGCAAGCCGCCCAAGGGCGTCAAGACCGACTGGATCATGCACAGTACCGCCTCACCGCGCCGCAACCGGACCCACCAAGCGC    | 450  |
| TaNAC69-3 | TACGGGGCAAGCCGCCCAAGGGCGTCAAGACCGACTGGATCATGCACAGTACCGCCTCACCGCGCCGCAACCGGACCCACCAAGCGC    | 450  |
| TuNAC69   | TACGGGGCAAGCCGCCCAAGGGCGTCAAGACCGACTGGATCATGCACAGTACCGCCTCACCGCGCCGCAACCGGACCCACCAAGCGC    | 450  |
| Consensus | tac ggggcaaggccgccaaggcgctcaagaccgactggatcatgcacaggtaccgcctcacccg gccgacaacggaccaccaagcgc  |      |
| TaNAC69-1 | AGAGGATCCTCCATGAGGCTGGATGACTGGGTGCTGTGTAGGATCCACAAGAAGTGCGGCAACTTGGCCAACTTCTCCTCTCTGACCAG  | 537  |
| TaNAC69-2 | AGAGGATCCTCCATGAGGCTGGATGACTGGGTGCTGTGTAGGATCCACAAGAAGTGCGGCAACTTGGCCAACTTCTCCTCTCTGACCAG  | 540  |
| TaNAC69-3 | AGAGGATCCTCCATGAGGCTGGATGACTGGGTGCTGTGTAGGATCCACAAGAAGTGCGGCAACTTGGCCAACTTCTCCTCTCTGACCAG  | 540  |
| TuNAC69   | AGAGGATCCTCCATGAGGCTGGATGACTGGGTGCTGTGTAGGATCCACAAGAAGTGCGGCAACTTGGCCAACTTCTCCTCTCTGACCAG  | 540  |
| Consensus | agagatcctccatgaggctggatgactgggtgctgtgtaggatccacaagaagtgc caacttgc caacttctcctctctgaccag    |      |
| TaNAC69-1 | GAACAGGAGCTGAGCAGGAGAGCTCCACC...GTGGAGGACTCGCACAACAACCACACCGGTGTCGTCGCCCAAGTGGAGGCTTCGAC   | 624  |
| TaNAC69-2 | GAACAGGAGCTGAGCAGGAGAGCTCCACC...GTGGAGGACTCGCACAACAACCACACCGGTGTCGTCGCCCAAGTGGAGGCTTCGAC   | 627  |
| TaNAC69-3 | GAACAGGAGCTGAGCAGGAGAGCTCCACC...GTGGAGGACTCGCACAACAACCACACCGGTGTCGTCGCCCAAGTGGAGGCTTCGAC   | 630  |
| TuNAC69   | GAACAGGAGCTGAGCAGGAGAGCTCCACC...GTGGAGGACTCGCACAACAACCACACCGGTGTCGTCGCCCAAGTGGAGGCTTCGAC   | 630  |
| Consensus | gaacaggagca gacaggagagctccacc gtggaggactcgca aacaaccacacccgtgtcgtcgcccaagt gaggccttcgac    |      |
| TaNAC69-1 | GGCGACGGCACGACCACTTCAGTTGCAGCAGTTCGCGCCCATGGCGATCGCCAAGTCGTGCTCCCTCACCAGCTGTCTCAACACCGTC   | 714  |
| TaNAC69-2 | GGCGACGGCACGACCACTTCAGTTGCAGCAGTTCGCGCCCATGGCGATCGCCAAGTCGTGCTCCCTCACCAGCTGTCTCAACACCGTC   | 717  |
| TaNAC69-3 | GGCGACGGCACGACCACTTCAGTTGCAGCAGTTCGCGCCCATGGCGATCGCCAAGTCGTGCTCCCTCACCAGCTGTCTCAACACCGTC   | 720  |
| TuNAC69   | GGCGACGGCACGACCACTTCAGTTGCAGCAGTTCGCGCCCATGGCGATCGCCAAGTCGTGCTCCCTCACCAGCTGTCTCAACACCGTC   | 720  |
| Consensus | ggcgacggc acgacca ct cag tgcagcagttccgccccatggcgatcgccaagtctgtctcctcaccgacctgtctcaacaccgtc |      |
| TaNAC69-1 | GACTACGCCGCGCTCTCGCACCCTCCTCTCGAGCGCGCGG...CGCCTCGTCTGTCGGACGCCGAGCAGACTACCAGTGCCTGCC      | 798  |
| TaNAC69-2 | GACTACGCCGCGCTCTCGCACCCTCCTCTCGAGCGCGCGG...CGCCTCGTCTGTCGGACGCCGAGCAGACTACCAGTGCCTGCC      | 801  |
| TaNAC69-3 | GACTACGCCGCGCTCTCGCACCCTCCTCTCGAGCGCGCGG...CGCCTCGTCTGTCGGACGCCGAGCAGACTACCAGTGCCTGCC      | 810  |
| TuNAC69   | GACTACGCCGCGCTCTCGCACCCTCCTCTCGAGCGCGCGG...CGCCTCGTCTGTCGGACGCCGAGCAGACTACCAGTGCCTGCC      | 810  |
| Consensus | gactacgcccgcgtctcgcacctcctcctcgagcgcgccgg cgctcgtctgctggacgcccggagcagactaccagctgccc cc     |      |
| TaNAC69-1 | GAAAACCGCTCATCTACTCGCAGCCTCCATGGCAACAACGCTACACTATAATAACA...CAAGGGCTACGTGAACACGAGACCATC     | 885  |
| TaNAC69-2 | GAAAACCGCTCATCTACTCGCAGCCTCCATGGCAACAACGCTACACTATAATAACA...CAAGGGCTACGTGAACACGAGACCATC     | 888  |
| TaNAC69-3 | GAAAACCGCTCATCTACTCGCAGCCTCCATGGCAACAACGCTACACTATAATAACA...CAAGGGCTACGTGAACACGAGACCATC     | 900  |
| TuNAC69   | GAAAACCGCTCATCTACTCGCAGCCTCCATGGCAACAACGCTACACTATAATAACA...CAAGGGCTACGTGAACACGAGACCATC     | 900  |
| Consensus | gaaaaccc ctcatctactcgcagcctccatggcaacaacgctacactataataacaa caa ggctacgtgaaca cga accatc    |      |
| TaNAC69-1 | GACGTGCCTCAGCTACCCGAGGCGCGGTAGATGACTACGGCATGAATGGCGATAGTATAACGGCATGAAGAGGACAGTCCAGCGGC     | 975  |
| TaNAC69-2 | GACGTGCCTCAGCTACCCGAGGCGCGGTAGATGACTACGGCATGAATGGCGATAGTATAACGGCATGAAGAGGACAGTCCAGCGGC     | 978  |
| TaNAC69-3 | GACGTGCCTCAGCTACCCGAGGCGCGGTAGATGACTACGGCATGAATGGCGATAGTATAACGGCATGAAGAGGACAGTCCAGCGGC     | 990  |
| TuNAC69   | GACGTGCCTCAGCTACCCGAGGCGCGGTAGATGACTACGGCATGAATGGCGATAGTATAACGGCATGAAGAGGACAGTCCAGCGGC     | 990  |
| Consensus | gacgtgcctcag taccggaggc g gtatagactacggcatgaatggcgata gta aacggcatgaa aggaa ag tccagcggc   |      |
| TaNAC69-1 | AGCTTGTTACTGCAGCCAGCTGCAGCTCCCGCGGGATCAGTACAGCGGCATGCTGATCCATCCGTTCTCAGCCAGCAGCTGCACATGTG  | 1064 |
| TaNAC69-2 | AGCTTGTTACTGCAGCCAGCTGCAGCTCCCGCGGGATCAGTACAGCGGCATGCTGATCCATCCGTTCTCAGCCAGCAGCTGCACATGTG  | 1067 |
| TaNAC69-3 | AGCTTGTTACTGCAGCCAGCTGCAGCTCCCGCGGGATCAGTACAGCGGCATGCTGATCCATCCGTTCTCAGCCAGCAGCTGCACATGTG  | 1079 |
| TuNAC69   | AGCTTGTTACTGCAGCCAGCTGCAGCTCCCGCGGGATCAGTACAGCGGCATGCTGATCCATCCGTTCTCAGCCAGCAGCTGCACATGTG  | 1079 |
| Consensus | ag ttgtactgcagccagctgcagctccc gggatcagtagacggcgatgctga ccatacgttctcagccagcagctgcacatgtg    |      |

Figure S1. Multiple comparisons between TuNAC69 and its homologs in wheat.
