# Supplementary material for: A NAC Transcription Factor TuNAC69 Contributes to ANK-NLR-WRKY NLR-Mediated Stripe Rust Resistance in the Diploid Wheat Triticum urartu
Source: Int J Mol Sci. 2022 Jan 5;23(1):564. doi: 10.3390/ijms23010564 (PMC8745140; doi:10.3390/ijms23010564)
Supplement: Supplementary file 1 [file ijms-23-00564-s001.zip]

Archive with 4 entries (4 files):
- Figure S1.pdf
- Figure S2.pdf
- Figure S3.pdf
- Table S1.xlsx
