# Supplementary material for: A NAC Transcription Factor TuNAC69 Contributes to ANK-NLR-WRKY NLR-Mediated Stripe Rust Resistance in the Diploid Wheat Triticum urartu
Source: Int J Mol Sci. 2022 Jan 5;23(1):564. doi: 10.3390/ijms23010564 (PMC8745140; doi:10.3390/ijms23010564)
Supplement: Supplementary file 1 [file ijms-23-00564-s001.zip › Table S1.xlsx]

## Sheet: Sheet1
Table S1 List of primers used in this study
Used for	primer names	primer sequences (from 5'-to 3')
Gene cloning	NAC69-F	ATGCCAATGGGCAGCAGC
	NAC69-R	TCACATGTGCAGCTGCTGGC
Real-time quantitative PCR	TuActin-F	GСАССТGАAССТТТCТGАACCAA
	TuActin-R	ТСGСТТАСGТGGСССТТGАТ
	Q-NAC69-F	TCATCTACTCGCAGCCTCCAT
	Q-NAC69-R	GTACCTATCGCCATTCATGCC
VIGS	V-NAC69-F	GATTCTTCTTCCGTTGCTAGCTCACCGACCTGCTCAACAC
	V-NAC69-R	TTTTTTTTTTTTTTAGCTAGCGTCGATGTTCACGTAGCCG
Subcellular localization	1300-NAC69-GFP-F	CTAGAGGATCCGGTACCCGGGATGCCAATGGGCAGCAGC
	1300-NAC69-GFP-R	CGCCCTTGCTCACCATCCCGGGCATGTGCAGCTGCTGGC
Gateway Entry primer	attB-NAC69-F	GGGGACAAGTTTGTACAAAAAAGCAGGCTTC ATGCCAATGGGCAGCAGC
	attB-NAC69-R	GGGGACCACTTTGTACAAGAAAGCTGGGTCCATGTGCAGCTGCTGGC
	attB-NAC69-R2	GGGGACCACTTTGTACAAGAAAGCTGGGTCTCACATGTGCAGCTGCTGGC
Genetic transformation of Arabidopsis thaliana	B4-NAC69-F	GCGGCCGCTCTAGAACTAGTATGCCAATGGGCAGCAGC
	B4-NAC69-R	GTACCGGGCCCCCCCTCGAGCATGTGCAGCTGCTGGCTGA
Transcriptional activation analysis	BD-NAC69-F	ATCTCAGAGGAGGACCTGCATATG ATGCCCAGCCCCGTGC
	BD-NAC69-NR	AGGTCGACGGATCCCCGGGAATTCAGAGGAGGAGAAGTTGTGCAAGTT
	BD-NAC69-CF	ATCTCAGAGGAGGACCTGCATATGGACCAGGAACAGGAGCACGAG
	BD-NAC69-R	AGGTCGACGGATCCCCGGGAATTCTCACATGTGCAGCTGCTGGC
Detection sequence	ce-NAC69-F	CTGGATGACTGGGTGCTGT
	ce-NAC69-R	ACGGTGTTGAGCAGGTCG
Reverse Transcription	OligdT	TTTTTTTTTTTTTTTTTT
